# Supplementary material for: Analysis of mitochondrial dynamics and function in the retinal pigment epithelium by high-speed high-resolution live imaging
Source: Frontiers journal article supplement (doi:10.3389/fcell.2022.1044672), 2022-10-28
Supplement: Data_Sheet_1.PDF [file Data_Sheet_1.PDF]

## *Supplementary Material*

### **Movie Caption**

**Movie 1.** Live imaging of mitochondrial dynamics (Mitotracker Deep Red, red) in primary polarized RPE monolayer using ~2 s timelapse interval for a total imaging time of 2 min.

**Movie 2.** Live imaging of mitochondrial dynamics (Mitotracker Deep Red, red) in primary polarized RPE monolayer using ~15 s timelapse interval for a total imaging time of 2 min.

**Movie 3.** Live imaging of changes in mitochondrial membrane potential (measured by TMRE, left) in a mitochondrial scission event (Mitotracker Deep Red, right) in a primary RPE monolayer. Warmer colors indicate higher fluorescence intensity of TMRE.

**Movie 4.** Live imaging of a dynamic mitochondrial calcium (mito-GCaMP5G, cyan) transfer event between mitochondrial strands (MitoTracker Deep Red, blue) mediated by the ER (ER-Tracker, red).

**Movie 5.** Live imaging of interactions between mitochondria (Mitotracker Deep Red, red) and lysosomes (LysoTracker, green) during a mitochondrial fission event.

**Movie 6.** Immunostaining of TOM20 (red) in an RPE flatmount from an albino BALB/c mouse. Animation plays through the RPE height starting from the apical surface, progressing to the basal side of the RPE, and then reversing back to the topmost apical plane. Actin is stained with phalloidin (white), and nuclei are labeled with DAPI (blue).

**Movie 7.** Immunostaining of TOM20 (red) in an RPE flatmount from a pigmented 129S1/SvImJ mouse. Animation plays through the RPE height starting from from the apical surface, progressing to the basal side of the RPE, and then reversing back to the topmost apical plane. Actin is stained with phalloidin (white), and nuclei are labeled with DAPI (blue).

**Movie 8.** Immunostaining of TOM20 (red) in an RPE flatmount from a pigmented C57BL/6J mouse. Animation plays through the RPE height starting from from the apical surface, progressing to the basal side of the RPE, and then reversing back to the topmost apical plane. Actin is stained with phalloidin (white), and nuclei are labeled with DAPI (blue).

**Movie 9.** Live imaging of mitochondrial membrane potential (TMRE) in a live RPE flatmount from 129S1/SvImJ mouse. Warmer colors represent higher TMRE intensities.

**Supplementary Table S1.** List of reagents and sources.

| <b>Antibody</b>                                         | <b>Host</b> | <b>IF</b> | <b>Source</b>                                   | <b>Identifier</b> |
|---------------------------------------------------------|-------------|-----------|-------------------------------------------------|-------------------|
| TOM20                                                   | Rabbit      | 1:200     | Santa Cruz Biotechnology Inc.,<br>Dallas, Texas | sc-11415          |
| CoraLite-<br>conjugated<br>TOM20                        | Rabbit      | 1:200     | ProteinTech, Rosemont, IL                       | CL488-11802       |
| Alexa Fluor 568<br>anti-Rabbit<br>secondary<br>antibody | Donkey      | 1:500     | ThermoFisher Scientific,<br>Waltham, MA         | A10042            |

| <b>Dyes</b>               | <b>Concentration</b>                             | <b>Source</b>                    | <b>Catalog<br/>number</b> |
|---------------------------|--------------------------------------------------|----------------------------------|---------------------------|
| DAPI                      | 14.3 mM stock<br>solution, used at<br>1:200      | Sigma-Aldrich, St. Louis,<br>MO  | D9542                     |
| Acti-stain 488 phalloidin | 1:200, incubated<br>with secondary<br>antibodies | Cytoskeleton Inc., Denver,<br>CO | PHDG1                     |
| Lysotracker Red           | 200 nM, 15 min                                   | ThermoFisher, Waltham,<br>MA     | L7528                     |
| Mitotracker Deep Red      | 200 nM, 15 min                                   | ThermoFisher, Waltham,<br>MA     | M22426                    |
| ER-tracker Red            | 1 $\mu$ M, 30 min                                | ThermoFisher, Waltham,<br>MA     | E34250                    |
| TMRE                      | 500 nM, 10 min                                   | Biotium, Fremont, CA             | 70005                     |

| <b>Plasmid</b>    | <b>Ref</b> | <b>Source</b>          | <b>Identifier</b> |
|-------------------|------------|------------------------|-------------------|
| pCAG mito-GCaMP5G | (1)        | Addgene, Watertown, MA | 105009            |

| <b>Biochemicals</b>        | <b>Source</b>                              | <b>Identifier</b> |
|----------------------------|--------------------------------------------|-------------------|
| Bovine Serum Albumin       | Rockland Immunochemicals,<br>Pottstown, PA | BSA-50            |
| Calcium Chloride Dihydrate | Sigma-Aldrich, St. Louis,<br>MO            | C7902             |

|                                |                                            |            |
|--------------------------------|--------------------------------------------|------------|
| Glucose                        | Sigma Aldrich, St. Louis, MO               | G7528      |
| HBSS                           | Corning, Corning, NY                       | 21-023-CV  |
| HEPES                          | ThermoFisher, Waltham, MA                  | 15630080   |
| Magnesium Chloride Hexahydrate | Sigma-Aldrich, St. Louis, MO               | M2393      |
| Paraformaldehyde (8%)          | Electron Microscopy Sciences, Hatfield, PA | 157-8      |
| Phosphate Buffer Saline        | ThermoFisher Scientific, Waltham, MA       | BP665-1    |
| Saponin                        | Sigma-Aldrich, St. Louis, MO               | 84510      |
| Triton-X                       | Sigma-Aldrich, St. Louis, MO               | X100-500ML |
| VectaShield                    | Vector Laboratories, Burlingame, CA        | H1000      |

| <b>Components for porcine RPE cell culture</b> |                                                |            |
|------------------------------------------------|------------------------------------------------|------------|
| Ciprofloxacin                                  | Sigma-Aldrich, St. Louis, MO                   | 17850-5G-F |
| DMEM                                           | Corning, Corning, NY                           | 10-013-CV  |
| Fetal Bovine Serum (heat-inactivated)          | American Type Culture Collection, Manassas, VA | 30-2020    |
| Non-essential amino acids (NEAA)               | Corning, Corning, NY                           | 25-025-CI  |
| Penicillin-Streptomycin                        | Corning, Corning, NY                           | 30-002-CI  |
| 0.25% Trypsin                                  | Corning, Corning, NY                           | 25-053-CI  |
| 2.5% Trypsin                                   | Lonza, Walkersville, MD                        | 17-160E    |
| Opti-MEM                                       | Gibco, ThermoFisher, Waltham, MA               | 319t85-070 |

## References

1. Kwon SK, Sando R, Lewis TL, Hirabayashi Y, Maximov A, Polleux F. LKB1 Regulates Mitochondria-Dependent Presynaptic Calcium Clearance and Neurotransmitter Release Properties at Excitatory Synapses along Cortical Axons. PLoS Biol. 2016;14(7):e1002516.
